# Supplementary material for: Effect of Bronchial Thermoplasty on Air Trapping Assessed by Xenon Ventilation Computed Tomography
Source: PubMed Central journal article supplement — Intern Med. 2021 Jul 1;60(13):2027–32. doi: 10.2169/internalmedicine.6493-20 (PMC8313928; doi:10.2169/internalmedicine.6493-20), 2021-07-01
Supplement: 1349-7235-60-2027-s001.pdf [file 1349-7235-60-2027-s001.pdf]

Table S1. Days after last OCS use at each visit

|         | <b>case1</b> | <b>case2</b> | <b>case3</b> | <b>case4</b> |
|---------|--------------|--------------|--------------|--------------|
| Visit 1 | 42           | 58           | 39           | 36           |
| Visit 2 | 15           | 35           | 29           | 16           |
| Visit 3 | 29           | 28           | 21           | 20           |
| Visit 4 | 35           | 61           | 42           | 42           |
